# Supplementary material
Source: publisher figshare collection journal article supplement (https://acs.figshare.com/ndownloader/files/4740778)
Supplement: Supplementary file 1 [file 4740778]

**Auto-correlation.** An initial analysis of the distribution of the slow-on and slow-off states' survival times showed an exponential decay with time, indicating a stochastic process<sup>1</sup>. However, the lifetimes of the fast-on and fast-off states were examined using the higher time-resolution technique (higher even than the sampling rate) of auto-correlation<sup>2</sup> of the time-resolved current measurements  $I(t)$ ,

$$g^{(2)}(\delta) = \langle I(t)I(t+\delta) \rangle / \langle I(t) \rangle^2.$$

Knowing that the distribution of survival times for both states is exponential, the auto-correlation was modelled by,

$$g^{(2)}(\delta) = 1 + C \exp[-(1/\tau_{on} + 1/\tau_{off})\delta],$$

with  $\tau_{on}$  and  $\tau_{off}$  the lifetimes of the on- and off-states.<sup>2</sup>

With well defined on- and off-states the contrast  $C = (I_{on} - I_{off})^2 / [\tau_{on} \tau_{off} (I_{on}/\tau_{on} + I_{off}/\tau_{off})]$  with  $I_{on}$  and  $I_{off}$  the tunnelling current values determined from the Gaussian fits to the current distributions. Within experimental error, both the auto-correlation and the distribution of survival time analysis gave the same lifetime values for the on-state and off-states for the slow-switch.

When only one state was well defined the other state's tunnelling current value, for example,  $I_{on}$  was substituted by  $(\tau_{off} I_{off} + I_{Average} \tau_{on} \tau_{off}) / \tau_{on}$  where  $I_{Average}$  is the average tunnelling current over the whole time-trace. From the resulting lifetime values the unknown tunnelling current was calculated.

## References

---

<sup>1</sup> Lastapis, M.; Martin, M.; Riedel, D.; Hellner, L.; Comtet, G.; Dujardin, G. *Science* **2005**, *308*, 1000.

<sup>2</sup> Zumbusch, A.; Fleury, L.; Brown, R.; Bernard, J.; Orrit, M. *Phys. Rev. Lett.* **1993**, *70*, 3584.
